# Supplementary material for: Human VH1-69 Gene-Encoded Human Monoclonal Antibodies against Staphylococcus aureus IsdB Use at Least Three Distinct Modes of Binding To Inhibit Bacterial Growth and Pathogenesis
Source: PubMed Central journal article supplement (PMC6805997; doi:10.1128/mbio.02473-19), 2019-10-22
Supplement: mBio.02473-19-sf002.pdf [file mBio.02473-19-sf002.pdf]

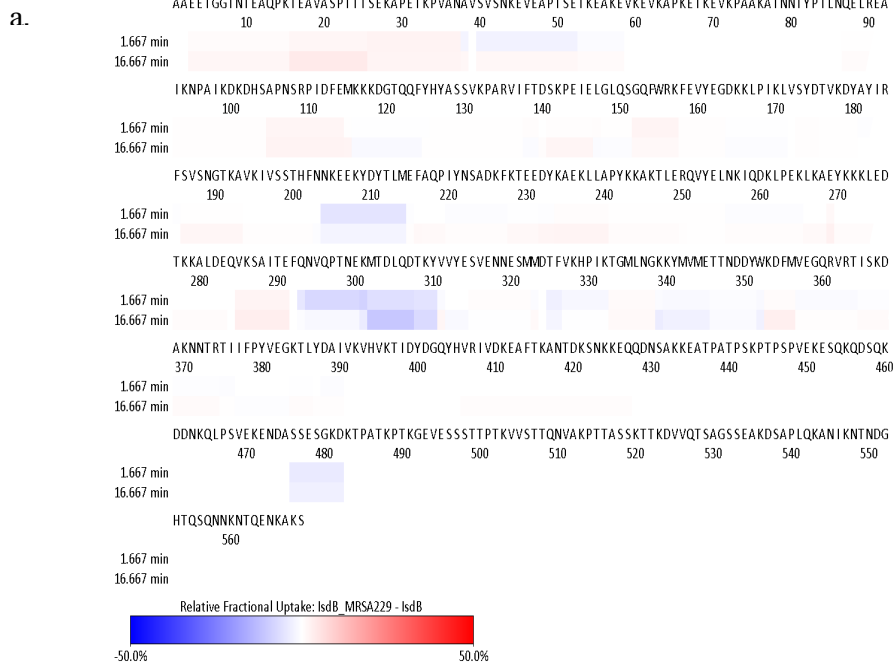

**b.**

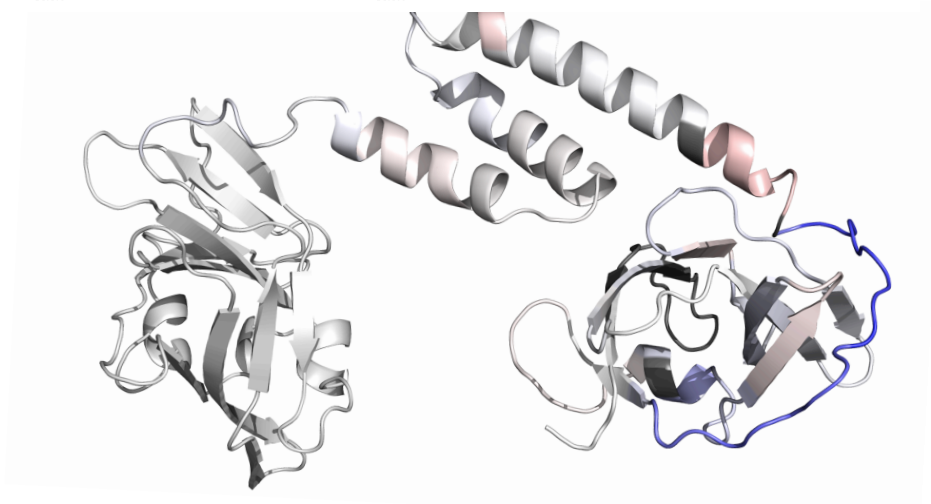

## Supplemental Figure 2. HDX-MS of IsdB-NEAT with STA-229

(a) Heat map showing the difference in relative deuterium-uptake of IsdB in complex with STA-229 Fab compared to unbound IsdB. The sequence of IsdB is shown and overlapping peptides are shown below. Shielded amino acids (blue) indicate potential binding-sites and are boxed. (b) The structure of crystalized IsdB is shown. Coloring represents the difference in deuterium-uptake in complex to that in the solitary IsdB from HDX. Scale ranges from -20 (blue) to +20 (red), black represents not observed regions.
