# Supplementary material for: Human VH1-69 Gene-Encoded Human Monoclonal Antibodies against Staphylococcus aureus IsdB Use at Least Three Distinct Modes of Binding To Inhibit Bacterial Growth and Pathogenesis
Source: PubMed Central journal article supplement (PMC6805997; doi:10.1128/mbio.02473-19), 2019-10-22
Supplement: mBio.02473-19-sf005.pdf [file mBio.02473-19-sf005.pdf]

|             | FR1 |   |   |   |   |   |   |   |   |   |    |    |    | HCDR1 |    |    |    |    |    |    |    |    |    | FR2 |    |    |    |    |    |    |    |    |    |    |    |    |    |    |    |    |    |    |    |    |   |   |   |   |   |   |   |   |
|-------------|-----|---|---|---|---|---|---|---|---|---|----|----|----|-------|----|----|----|----|----|----|----|----|----|-----|----|----|----|----|----|----|----|----|----|----|----|----|----|----|----|----|----|----|----|----|---|---|---|---|---|---|---|---|
| Consensus   | 0   | 1 | 2 | 3 | 4 | 5 | 6 | 7 | 8 | 9 | 10 | 11 | 12 | 13    | 14 | 15 | 16 | 17 | 18 | 19 | 20 | 21 | 22 | 23  | 24 | 25 | 26 | 27 | 28 | 29 | 30 | 31 | 32 | 33 | 34 | 35 | 36 | 37 | 38 | 39 | 40 | 41 | 42 | 43 |   |   |   |   |   |   |   |   |
| IGHV1-69*01 | Q   | V | Q | L | M | Q | S | G | A | E | V  | K  | K  | T     | G  | S  | S  | V  | K  | V  | S  | C  | T  | A   | S  | G  | G  | T  | F  | N  | T  | N  | D  | L  | M  | W  | V  | R  | Q  | A  | P  | G  | Q  | G  |   |   |   |   |   |   |   |   |
| Variant 5   | .   | . | . | . | V | . | . | . | . | . | .  | .  | .  | .     | .  | .  | .  | .  | .  | .  | .  | .  | .  | .   | .  | T  | .  | .  | .  | .  | S  | S  | Y  | A  | I  | S  | .  | .  | .  | .  | .  | .  | .  | .  | . | . | . |   |   |   |   |   |
| Variant 9   | .   | . | . | . | . | . | . | . | . | . | .  | .  | .  | .     | .  | .  | .  | .  | .  | .  | .  | .  | .  | .   | .  | .  | .  | .  | .  | .  | .  | .  | .  | .  | .  | .  | .  | .  | .  | .  | .  | .  | .  | .  | . | . | . | . | . | . |   |   |
| IgG         | .   | . | . | . | V | . | . | . | . | . | .  | .  | .  | .     | .  | .  | .  | .  | .  | .  | .  | .  | .  | .   | .  | .  | .  | .  | .  | .  | .  | .  | .  | .  | .  | .  | .  | .  | .  | .  | .  | .  | .  | .  | . | . | . | . | . | . |   |   |
| Variant 8   | .   | . | . | . | E | . | . | . | . | . | .  | .  | .  | .     | .  | .  | .  | .  | .  | .  | .  | .  | .  | .   | .  | .  | .  | .  | .  | .  | .  | .  | .  | .  | .  | .  | .  | .  | .  | .  | .  | .  | .  | .  | . | . | . | . | . | . | . |   |
| Variant 10  | .   | . | . | . | E | . | . | . | . | . | .  | .  | .  | .     | .  | .  | .  | .  | .  | .  | .  | .  | .  | .   | .  | .  | .  | .  | .  | .  | .  | .  | .  | .  | .  | .  | .  | .  | .  | .  | .  | .  | .  | .  | . | . | . | . | . | . | . |   |
| Variant 1   | .   | A | . | . | . | . | . | . | . | . | .  | .  | .  | .     | .  | .  | .  | .  | .  | .  | .  | .  | .  | .   | .  | .  | .  | .  | .  | .  | .  | .  | .  | .  | .  | .  | .  | .  | .  | .  | .  | .  | .  | .  | . | . | . | . | . | . | . |   |
| Variant 7   | .   | . | . | . | . | . | . | . | . | . | .  | .  | .  | .     | .  | .  | .  | .  | .  | .  | .  | .  | .  | .   | .  | .  | .  | .  | .  | .  | .  | .  | .  | .  | .  | .  | .  | .  | .  | .  | .  | .  | .  | .  | . | . | . | . | . | . | . |   |
| Variant 3   | .   | . | . | . | . | . | . | . | . | . | .  | .  | .  | .     | .  | .  | .  | .  | .  | .  | .  | .  | .  | .   | .  | .  | .  | .  | .  | .  | .  | .  | .  | .  | .  | .  | .  | .  | .  | .  | .  | .  | .  | .  | . | . | . | . | . | . | . |   |
| Variant 4   | .   | . | . | . | . | . | . | . | . | . | .  | .  | .  | .     | .  | .  | .  | .  | .  | .  | .  | .  | .  | .   | .  | .  | .  | .  | .  | .  | .  | .  | .  | .  | .  | .  | .  | .  | .  | .  | .  | .  | .  | .  | . | . | . | . | . | . | . |   |
| Variant 6   | .   | . | P | . | . | . | . | . | . | . | .  | .  | .  | .     | .  | .  | .  | .  | .  | .  | .  | .  | .  | .   | .  | .  | .  | .  | .  | .  | .  | .  | .  | .  | .  | .  | .  | .  | .  | .  | .  | .  | .  | .  | . | . | . | . | . | . | . |   |
| Variant 2   | .   | . | . | . | . | . | . | . | . | . | .  | .  | .  | .     | .  | .  | .  | .  | .  | .  | .  | .  | .  | .   | .  | .  | .  | .  | .  | .  | .  | .  | .  | .  | .  | .  | .  | .  | .  | .  | .  | .  | .  | .  | . | . | . | . | . | . | . | . |

  

|             | FR2 |    |    |    |    | HCDR2 |    |    |    |    | FR3 |    |    |    |    | DE loop/HCDR4 |    |    |    |    | FR3 |    |    |    |    |    |    |    |    |    |    |    |    |    |    |    |    |   |   |   |   |   |   |   |   |   |   |   |   |   |   |   |
|-------------|-----|----|----|----|----|-------|----|----|----|----|-----|----|----|----|----|---------------|----|----|----|----|-----|----|----|----|----|----|----|----|----|----|----|----|----|----|----|----|----|---|---|---|---|---|---|---|---|---|---|---|---|---|---|---|
| Consensus   | 44  | 45 | 46 | 47 | 48 | 49    | 50 | 51 | 52 | 53 | 54  | 55 | 56 | 57 | 58 | 59            | 60 | 61 | 62 | 63 | 64  | 65 | 66 | 67 | 68 | 69 | 70 | 71 | 72 | 73 | 74 | 75 | 76 | 77 | 78 | 79 | 80 |   |   |   |   |   |   |   |   |   |   |   |   |   |   |   |
| IGHV1-69*01 | L   | E  | W  | M  | G  | G     | I  | V  | P  | V  | F   | G  | K  | P  | K  | Y             | A  | K  | K  | F  | H   | G  | R  | L  | I  | I  | T  | A  | D  | E  | Y  | T  | M  | T  | T  | V  | Y  | M | E | L | T | S | L | T |   |   |   |   |   |   |   |   |
| Variant 5   | .   | .  | .  | .  | .  | .     | .  | .  | .  | .  | .   | .  | .  | .  | .  | .             | .  | .  | .  | .  | .   | .  | .  | .  | .  | .  | .  | .  | .  | .  | .  | .  | .  | .  | .  | .  | .  | . | . | . | . | . | . | . | . | . | . | . | . | . | . | . |
| Variant 9   | .   | .  | .  | .  | .  | .     | .  | .  | .  | .  | .   | .  | .  | .  | .  | .             | .  | .  | .  | .  | .   | .  | .  | .  | .  | .  | .  | .  | .  | .  | .  | .  | .  | .  | .  | .  | .  | . | . | . | . | . | . | . | . | . | . | . | . | . | . | . |
| IgG         | .   | .  | .  | .  | .  | .     | .  | .  | .  | .  | .   | .  | .  | .  | .  | .             | .  | .  | .  | .  | .   | .  | .  | .  | .  | .  | .  | .  | .  | .  | .  | .  | .  | .  | .  | .  | .  | . | . | . | . | . | . | . | . | . | . | . | . | . | . | . |
| Variant 8   | .   | .  | .  | .  | .  | .     | .  | .  | .  | .  | .   | .  | .  | .  | .  | .             | .  | .  | .  | .  | .   | .  | .  | .  | .  | .  | .  | .  | .  | .  | .  | .  | .  | .  | .  | .  | .  | . | . | . | . | . | . | . | . | . | . | . | . | . | . | . |
| Variant 10  | .   | .  | .  | .  | .  | .     | .  | .  | .  | .  | .   | .  | .  | .  | .  | .             | .  | .  | .  | .  | .   | .  | .  | .  | .  | .  | .  | .  | .  | .  | .  | .  | .  | .  | .  | .  | .  | . | . | . | . | . | . | . | . | . | . | . | . | . | . | . |
| Variant 1   | .   | .  | .  | .  | .  | .     | .  | .  | .  | .  | .   | .  | .  | .  | .  | .             | .  | .  | .  | .  | .   | .  | .  | .  | .  | .  | .  | .  | .  | .  | .  | .  | .  | .  | .  | .  | .  | . | . | . | . | . | . | . | . | . | . | . | . | . | . | . |
| Variant 7   | .   | .  | .  | .  | .  | .     | .  | .  | .  | .  | .   | .  | .  | .  | .  | .             | .  | .  | .  | .  | .   | .  | .  | .  | .  | .  | .  | .  | .  | .  | .  | .  | .  | .  | .  | .  | .  | . | . | . | . | . | . | . | . | . | . | . | . | . | . | . |
| Variant 3   | .   | .  | .  | .  | .  | .     | .  | .  | .  | .  | .   | .  | .  | .  | .  | .             | .  | .  | .  | .  | .   | .  | .  | .  | .  | .  | .  | .  | .  | .  | .  | .  | .  | .  | .  | .  | .  | . | . | . | . | . | . | . | . | . | . | . | . | . | . | . |
| Variant 4   | .   | .  | .  | .  | .  | .     | .  | .  | .  | .  | .   | .  | .  | .  | .  | .             | .  | .  | .  | .  | .   | .  | .  | .  | .  | .  | .  | .  | .  | .  | .  | .  | .  | .  | .  | .  | .  | . | . | . | . | . | . | . | . | . | . | . | . | . | . | . |
| Variant 6   | .   | .  | .  | .  | .  | .     | .  | .  | .  | .  | .   | .  | .  | .  | .  | .             | .  | .  | .  | .  | .   | .  | .  | .  | .  | .  | .  | .  | .  | .  | .  | .  | .  | .  | .  | .  | .  | . | . | . | . | . | . | . | . | . | . | . | . | . | . | . |
| Variant 2   | .   | .  | .  | .  | .  | .     | .  | .  | .  | .  | .   | .  | .  | .  | .  | .             | .  | .  | .  | .  | .   | .  | .  | .  | .  | .  | .  | .  | .  | .  | .  | .  | .  | .  | .  | .  | .  | . | . | . | . | . | . | . | . | . | . | . | . | . | . | . |

  

|             | FR3 |    |    |    |    | HCDR3 |    |    |    |    |    |    |    |     |     | FR4 |     |     |     |     |     |     |     |     |     |     |     |     |     |     |     |     |     |     |     |   |   |   |   |   |   |   |   |   |   |   |   |   |   |   |   |   |   |
|-------------|-----|----|----|----|----|-------|----|----|----|----|----|----|----|-----|-----|-----|-----|-----|-----|-----|-----|-----|-----|-----|-----|-----|-----|-----|-----|-----|-----|-----|-----|-----|-----|---|---|---|---|---|---|---|---|---|---|---|---|---|---|---|---|---|---|
| Consensus   | 87  | 88 | 89 | 90 | 91 | 92    | 93 | 94 | 95 | 96 | 97 | 98 | 99 | 100 | 101 | 102 | 103 | 104 | 105 | 106 | 107 | 108 | 109 | 110 | 111 | 112 | 113 | 114 | 115 | 116 | 117 | 118 | 119 | 120 | 121 |   |   |   |   |   |   |   |   |   |   |   |   |   |   |   |   |   |   |
| IGHV1-69*01 | F   | D  | D  | T  | A  | I     | Y  | F  | C  | A  | R  | S  | G  | S   | T   | E   | S   | P   | I   | Q   | Y   | I   | D   | F   | W   | G   | Q   | G   | T   | R   | L   | V   | T   | V   | S   | S |   |   |   |   |   |   |   |   |   |   |   |   |   |   |   |   |   |
| Variant 5   | .   | .  | .  | .  | V  | .     | .  | .  | .  | .  | .  | .  | .  | .   | .   | .   | .   | .   | .   | .   | .   | .   | .   | .   | .   | .   | .   | .   | .   | .   | .   | .   | .   | .   | .   | . | . | . | . | . | . | . | . | . | . | . | . | . | . | . | . | . | . |
| Variant 9   | .   | .  | .  | .  | .  | .     | .  | .  | .  | .  | .  | .  | .  | .   | .   | .   | .   | .   | .   | .   | .   | .   | .   | .   | .   | .   | .   | .   | .   | .   | .   | .   | .   | .   | .   | . | . | . | . | . | . | . | . | . | . | . | . | . | . | . | . | . | . |
| IgG         | .   | .  | .  | .  | .  | .     | .  | .  | .  | .  | .  | .  | .  | .   | .   | .   | .   | .   | .   | .   | .   | .   | .   | .   | .   | .   | .   | .   | .   | .   | .   | .   | .   | .   | .   | . | . | . | . | . | . | . | . | . | . | . | . | . | . | . | . | . | . |
| Variant 8   | .   | .  | .  | .  | .  | .     | .  | .  | .  | .  | .  | .  | .  | .   | .   | .   | .   | .   | .   | .   | .   | .   | .   | .   | .   | .   | .   | .   | .   | .   | .   | .   | .   | .   | .   | . | . | . | . | . | . | . | . | . | . | . | . | . | . | . | . | . | . |
| Variant 10  | .   | .  | .  | .  | .  | .     | .  | .  | .  | .  | .  | .  | .  | .   | .   | .   | .   | .   | .   | .   | .   | .   | .   | .   | .   | .   | .   | .   | .   | .   | .   | .   | .   | .   | .   | . | . | . | . | . | . | . | . | . | . | . | . | . | . | . | . | . | . |
| Variant 1   | .   | .  | .  | .  | .  | .     | .  | .  | .  | .  | .  | .  | .  | .   | .   | .   | .   | .   | .   | .   | .   | .   | .   | .   | .   | .   | .   | .   | .   | .   | .   | .   | .   | .   | .   | . | . | . | . | . | . | . | . | . | . | . | . | . | . | . | . | . | . |
| Variant 7   | .   | .  | .  | .  | .  | .     | .  | .  | .  | .  | .  | .  | .  | .   | .   | .   | .   | .   | .   | .   | .   | .   | .   | .   | .   | .   | .   | .   | .   | .   | .   | .   | .   | .   | .   | . | . | . | . | . | . | . | . | . | . | . | . | . | . | . | . | . | . |
| Variant 3   | .   | .  | .  | .  | .  | .     | .  | .  | .  | .  | .  | .  | .  | .   | .   | .   | .   | .   | .   | .   | .   | .   | .   | .   | .   | .   | .   | .   | .   | .   | .   | .   | .   | .   | .   | . | . | . | . | . | . | . | . | . | . | . | . | . | . | . | . | . | . |
| Variant 4   | .   | .  | .  | .  | .  | .     | .  | .  | .  | .  | .  | .  | .  | .   | .   | .   | .   | .   | .   | .   | .   | .   | .   | .   | .   | .   | .   | .   | .   | .   | .   | .   | .   | .   | .   | . | . | . | . | . | . | . | . | . | . | . | . | . | . | . | . | . | . |
| Variant 6   | .   | .  | .  | .  | .  | .     | .  | .  | .  | .  | .  | .  | .  | .   | .   | .   | .   | .   | .   | .   | .   | .   | .   | .   | .   | .   | .   | .   | .   | .   | .   | .   | .   | .   | .   | . | . | . | . | . | . | . | . | . | . | . | . | . | . | . | . | . | . |
| Variant 2   | .   | .  | .  | .  | .  | .     | .  | .  | .  | .  | .  | .  | .  | .   | .   | .   | .   | .   | .   | .   | .   | .   | .   | .   | .   | .   | .   | .   | .   | .   | .   | .   | .   | .   | .   | . | . | . | . | . | . | . | . | . | . | . | . | . | . | . | . | . | . |

**Supplemental Figure 5. Sequence alignment of STAU-307 and clonal variants.** A global alignment using Geneious was performed with the germline *IGHV1-69\*01* gene sequence, the sequence from the hybridoma encoding the original IgG, and all STAU-307 clonal variants. Each HCDR and FR region is denoted, with a consensus sequence indicated. Point mutants that differ from the consensus are shown as individual amino acids whereas conserved residues are represented as dots.
