# Supplementary material for: Human VH1-69 Gene-Encoded Human Monoclonal Antibodies against Staphylococcus aureus IsdB Use at Least Three Distinct Modes of Binding To Inhibit Bacterial Growth and Pathogenesis
Source: PubMed Central journal article supplement (PMC6805997; doi:10.1128/mbio.02473-19), 2019-10-22
Supplement: mBio.02473-19-sf006.pdf [file mBio.02473-19-sf006.pdf]

|               | FR1 |   |   |   |   |   |   |   |   |   |    | HCDR1 |    |    |    |    |    |    | FR2 |    |    |    |    |    |   |   |   |   |   |   |   |   |   |   |   |   |   |   |   |   |   |   |   |   |   |
|---------------|-----|---|---|---|---|---|---|---|---|---|----|-------|----|----|----|----|----|----|-----|----|----|----|----|----|---|---|---|---|---|---|---|---|---|---|---|---|---|---|---|---|---|---|---|---|---|
|               | 0   | 1 | 2 | 3 | 4 | 5 | 6 | 7 | 8 | 9 | 10 | 24    | 25 | 26 | 27 | 28 | 29 | 31 | 32  | 33 | 34 | 35 | 36 | 43 |   |   |   |   |   |   |   |   |   |   |   |   |   |   |   |   |   |   |   |   |   |
| Consensus     | E   | V | Q | L | V | Q | S | G | A | E | V  | K     | K  | P  | G  | A  | T  | V  | K   | I  | S  | C  | Q  | V  | S | G | Y | T | F | T | D | Y | Y | I | H | W | V | Q | Q | A | P | G | K | G |   |
| IGHV1-69-2*01 | .   | . | . | . | . | . | . | . | . | . | .  | .     | .  | .  | .  | .  | .  | .  | .   | .  | .  | .  | .  | .  | . | . | . | . | . | . | . | . | . | . | . | . | . | . | . | . | . | . | . | . | . |
| IgG           | .   | . | . | . | . | . | . | . | . | . | .  | .     | .  | .  | .  | .  | .  | .  | .   | .  | .  | .  | .  | .  | . | . | . | . | . | . | . | . | . | . | . | . | . | . | . | . | . | . | . |   |   |
| Variant 7     | .   | . | . | . | A | . | . | . | . | . | .  | .     | .  | .  | .  | M  | M  | .  | .   | .  | .  | .  | .  | .  | . | . | . | . | . | . | . | . | . | . | . | . | . | . | . | . | . | . |   |   |   |
| Variant 9     | .   | . | . | . | A | . | . | . | . | . | .  | .     | .  | .  | .  | M  | M  | .  | .   | .  | .  | .  | .  | .  | . | . | . | . | . | . | . | . | . | . | . | . | . | . | . | . | . | . |   |   |   |
| Variant 8     | .   | . | . | . | . | . | . | . | . | . | .  | .     | .  | .  | .  | .  | .  | .  | .   | .  | .  | .  | .  | .  | . | . | . | . | . | . | . | . | . | . | . | . | . | . | . | . | . | . | . |   |   |
| Variant 5     | .   | . | . | . | . | . | . | . | . | . | .  | .     | .  | .  | .  | .  | .  | .  | .   | .  | .  | .  | .  | .  | . | . | . | . | . | . | . | . | . | . | . | . | . | . | . | . | . | . | . |   |   |
| Variant 6     | .   | . | . | . | . | . | . | . | . | . | .  | .     | .  | .  | .  | .  | .  | .  | .   | .  | .  | .  | .  | .  | . | . | . | . | . | . | . | . | . | . | . | . | . | . | . | . | . | . | . |   |   |
| Variant 3     | .   | . | . | . | . | . | . | . | . | . | .  | .     | .  | .  | .  | .  | .  | .  | .   | .  | .  | .  | .  | .  | . | . | . | . | . | . | . | . | . | . | . | . | . | . | . | . | . | . | . |   |   |
| Variant 10    | .   | . | . | . | . | . | . | . | . | . | .  | .     | .  | .  | .  | .  | .  | .  | .   | .  | .  | .  | .  | .  | . | . | . | . | . | . | . | . | . | . | . | . | . | . | . | . | . | . | . |   |   |
| Variant 4     | .   | . | . | . | . | . | . | . | . | . | .  | .     | .  | .  | .  | .  | .  | .  | .   | .  | .  | .  | .  | .  | . | . | . | . | . | . | . | . | . | . | . | . | . | . | . | . | . | . | . |   |   |
| Variant 2     | .   | . | . | . | . | . | . | . | . | . | .  | .     | .  | .  | .  | .  | .  | .  | .   | .  | .  | .  | .  | .  | . | . | . | . | . | . | . | . | . | . | . | . | . | . | . | . | . | . | . |   |   |
| Variant 1     | .   | . | . | . | . | . | . | . | . | . | .  | .     | .  | .  | .  | .  | .  | .  | .   | .  | .  | .  | .  | .  | . | . | . | . | . | . | . | . | . | . | . | . | . | . | . | . | . | . | . |   |   |

  

|               | FR2 |    |    |    |    | HCDR2 |    |    |    |    | FR3 |    |    |    |    |    |    | DE loop/HCDR4 |    |    |    |    |    | FR3 |    |    |    |    |    |    |    |    |    |    |    |    |    |    |   |   |   |   |   |   |   |   |
|---------------|-----|----|----|----|----|-------|----|----|----|----|-----|----|----|----|----|----|----|---------------|----|----|----|----|----|-----|----|----|----|----|----|----|----|----|----|----|----|----|----|----|---|---|---|---|---|---|---|---|
|               | 44  | 45 | 46 | 47 | 48 | 49    | 50 | 51 | 52 | 53 | 57  | 58 | 59 | 60 | 61 | 62 | 63 | 64            | 65 | 66 | 67 | 68 | 69 | 70  | 71 | 72 | 73 | 74 | 75 | 76 | 77 | 78 | 79 | 80 | 81 | 82 | 83 | 84 |   |   |   |   |   |   |   |   |
| Consensus     | L   | E  | W  | M  | G  | L     | V  | D  | P  | E  | D   | G  | E  | T  | R  | Y  | A  | E             | K  | F  | Q  | G  | R  | V   | T  | I  | T  | A  | D  | T  | S  | T  | D  | T  | A  | Y  | M  | E  | M | S | S | L | T |   |   |   |
| IGHV1-69-2*01 | .   | .  | .  | .  | .  | .     | .  | .  | .  | .  | .   | .  | .  | .  | .  | .  | .  | .             | .  | .  | .  | .  | .  | .   | .  | .  | .  | .  | .  | .  | .  | .  | .  | .  | .  | .  | .  | .  | . | . | . | . | . | . | . | . |
| IgG           | .   | .  | .  | .  | .  | .     | .  | .  | .  | .  | .   | .  | .  | .  | .  | .  | .  | .             | .  | .  | .  | .  | .  | .   | .  | .  | .  | .  | .  | .  | .  | .  | .  | .  | .  | .  | .  | .  | . | . | . | . | . | . | . |   |
| Variant 7     | .   | .  | .  | .  | .  | .     | .  | .  | .  | .  | .   | .  | .  | .  | .  | .  | .  | .             | .  | .  | .  | .  | .  | .   | .  | .  | .  | .  | .  | .  | .  | .  | .  | .  | .  | .  | .  | .  | . | . | . | . | . | . | . |   |
| Variant 9     | .   | .  | .  | .  | .  | .     | .  | .  | .  | .  | .   | .  | .  | .  | .  | .  | .  | .             | .  | .  | .  | .  | .  | .   | .  | .  | .  | .  | .  | .  | .  | .  | .  | .  | .  | .  | .  | .  | . | . | . | . | . | . | . |   |
| Variant 8     | .   | .  | .  | .  | .  | .     | .  | .  | .  | .  | .   | .  | .  | .  | .  | .  | .  | .             | .  | .  | .  | .  | .  | .   | .  | .  | .  | .  | .  | .  | .  | .  | .  | .  | .  | .  | .  | .  | . | . | . | . | . | . |   |   |
| Variant 5     | .   | .  | .  | .  | .  | .     | .  | .  | .  | .  | .   | .  | .  | .  | .  | .  | .  | .             | .  | .  | .  | .  | .  | .   | .  | .  | .  | .  | .  | .  | .  | .  | .  | .  | .  | .  | .  | .  | . | . | . | . | . | . |   |   |
| Variant 6     | .   | .  | .  | .  | .  | .     | .  | .  | .  | .  | .   | .  | .  | .  | .  | .  | .  | .             | .  | .  | .  | .  | .  | .   | .  | .  | .  | .  | .  | .  | .  | .  | .  | .  | .  | .  | .  | .  | . | . | . | . | . | . |   |   |
| Variant 3     | .   | .  | .  | .  | .  | .     | .  | .  | .  | .  | .   | .  | .  | .  | .  | .  | .  | .             | .  | .  | .  | .  | .  | .   | .  | .  | .  | .  | .  | .  | .  | .  | .  | .  | .  | .  | .  | .  | . | . | . | . | . | . |   |   |
| Variant 10    | .   | .  | .  | .  | .  | .     | .  | .  | .  | .  | .   | .  | .  | .  | .  | .  | .  | .             | .  | .  | .  | .  | .  | .   | .  | .  | .  | .  | .  | .  | .  | .  | .  | .  | .  | .  | .  | .  | . | . | . | . | . | . |   |   |
| Variant 4     | .   | .  | .  | .  | .  | .     | .  | .  | .  | .  | .   | .  | .  | .  | .  | .  | .  | .             | .  | .  | .  | .  | .  | .   | .  | .  | .  | .  | .  | .  | .  | .  | .  | .  | .  | .  | .  | .  | . | . | . | . | . | . |   |   |
| Variant 2     | .   | .  | .  | .  | .  | .     | .  | .  | .  | .  | .   | .  | .  | .  | .  | .  | .  | .             | .  | .  | .  | .  | .  | .   | .  | .  | .  | .  | .  | .  | .  | .  | .  | .  | .  | .  | .  | .  | . | . | . | . | . | . |   |   |
| Variant 1     | .   | .  | .  | .  | .  | .     | .  | .  | .  | .  | .   | .  | .  | .  | .  | .  | .  | .             | .  | .  | .  | .  | .  | .   | .  | .  | .  | .  | .  | .  | .  | .  | .  | .  | .  | .  | .  | .  | . | . | . | . | . | . |   |   |

  

|               | FR3 |    |    |    |    |    |    |    |    |    | HCDR3 |     |     |     |     |     |     |     |     |     |     |     | FR4 |     |     |     |     |     |     |     |     |     |     |     |     |     |   |   |   |   |   |   |   |   |   |   |   |
|---------------|-----|----|----|----|----|----|----|----|----|----|-------|-----|-----|-----|-----|-----|-----|-----|-----|-----|-----|-----|-----|-----|-----|-----|-----|-----|-----|-----|-----|-----|-----|-----|-----|-----|---|---|---|---|---|---|---|---|---|---|---|
|               | 87  | 88 | 89 | 90 | 91 | 92 | 93 | 94 | 95 | 96 | 103   | 104 | 105 | 106 | 107 | 108 | 109 | 110 | 111 | 112 | 113 | 114 | 115 | 116 | 117 | 118 | 119 | 120 | 121 | 122 | 123 | 124 | 125 | 126 | 127 | 128 |   |   |   |   |   |   |   |   |   |   |   |
| Consensus     | S   | E  | D  | A  | A  | V  | Y  | Y  | C  | A  | K     | P   | H   | C   | T   | T   | S   | S   | C   | Q   | R   | V   | S   | G   | Y   | Y   | F   | G   | M   | D   | V   | W   | G   | Q   | G   | T   | T | V | T | V | S | S |   |   |   |   |   |
| IGHV1-69-2*01 | .   | .  | .  | .  | .  | .  | .  | .  | .  | .  | .     | .   | .   | .   | .   | .   | .   | .   | .   | .   | .   | .   | .   | .   | .   | .   | .   | .   | .   | .   | .   | .   | .   | .   | .   | .   | . | . | . | . | . | . | . | . | . | . | . |
| IgG           | .   | .  | .  | .  | .  | .  | .  | .  | .  | .  | .     | .   | .   | .   | .   | .   | .   | .   | .   | .   | .   | .   | .   | .   | .   | .   | .   | .   | .   | .   | .   | .   | .   | .   | .   | .   | . | . | . | . | . | . | . | . | . | . | . |
| Variant 7     | .   | .  | .  | .  | .  | .  | .  | .  | .  | .  | .     | .   | .   | .   | .   | .   | .   | .   | .   | .   | .   | .   | .   | .   | .   | .   | .   | .   | .   | .   | .   | .   | .   | .   | .   | .   | . | . | . | . | . | . | . | . | . | . |   |
| Variant 9     | .   | .  | .  | .  | .  | .  | .  | .  | .  | .  | .     | .   | .   | .   | .   | .   | .   | .   | .   | .   | .   | .   | .   | .   | .   | .   | .   | .   | .   | .   | .   | .   | .   | .   | .   | .   | . | . | . | . | . | . | . | . | . | . |   |
| Variant 8     | .   | .  | .  | .  | .  | .  | .  | .  | .  | .  | .     | .   | .   | .   | .   | .   | .   | .   | .   | .   | .   | .   | .   | .   | .   | .   | .   | .   | .   | .   | .   | .   | .   | .   | .   | .   | . | . | . | . | . | . | . | . | . | . |   |
| Variant 5     | .   | .  | .  | .  | .  | .  | .  | .  | .  | .  | .     | .   | .   | .   | .   | .   | .   | .   | .   | .   | .   | .   | .   | .   | .   | .   | .   | .   | .   | .   | .   | .   | .   | .   | .   | .   | . | . | . | . | . | . | . | . | . | . |   |
| Variant 6     | .   | .  | .  | .  | .  | .  | .  | .  | .  | .  | .     | .   | .   | .   | .   | .   | .   | .   | .   | .   | .   | .   | .   | .   | .   | .   | .   | .   | .   | .   | .   | .   | .   | .   | .   | .   | . | . | . | . | . | . | . | . | . | . |   |
| Variant 3     | .   | .  | .  | .  | .  | .  | .  | .  | .  | .  | .     | .   | .   | .   | .   | .   | .   | .   | .   | .   | .   | .   | .   | .   | .   | .   | .   | .   | .   | .   | .   | .   | .   | .   | .   | .   | . | . | . | . | . | . | . | . | . | . |   |
| Variant 10    | .   | .  | .  | .  | .  | .  | .  | .  | .  | .  | .     | .   | .   | .   | .   | .   | .   | .   | .   | .   | .   | .   | .   | .   | .   | .   | .   | .   | .   | .   | .   | .   | .   | .   | .   | .   | . | . | . | . | . | . | . | . | . | . |   |
| Variant 4     | .   | .  | .  | .  | .  | .  | .  | .  | .  | .  | .     | .   | .   | .   | .   | .   | .   | .   | .   | .   | .   | .   | .   | .   | .   | .   | .   | .   | .   | .   | .   | .   | .   | .   | .   | .   | . | . | . | . | . | . | . | . | . | . |   |
| Variant 2     | .   | .  | .  | .  | .  | .  | .  | .  | .  | .  | .     | .   | .   | .   | .   | .   | .   | .   | .   | .   | .   | .   | .   | .   | .   | .   | .   | .   | .   | .   | .   | .   | .   | .   | .   | .   | . | . | . | . | . | . | . | . | . | . |   |
| Variant 1     | .   | .  | .  | .  | .  | .  | .  | .  | .  | .  | .     | .   | .   | .   | .   | .   | .   | .   | .   | .   | .   | .   | .   | .   | .   | .   | .   | .   | .   | .   | .   | .   | .   | .   | .   | .   | . | . | . | . | . | . | . | . | . | . |   |

**Supplemental Figure 6. Sequence alignment of STAU-229 and clonal variants.** A global alignment using Geneious was performed with the germline *IGHV1-69-2\*01* gene sequence, the sequence from the hybridoma encoding the original IgG, and all STAU-229 clonal variants. Each HCDR and FR region is denoted, with a consensus sequence indicated. Point mutants that differ from the consensus are shown as individual amino acids whereas conserved residues are represented as dots.
