# Supplementary material for: Human VH1-69 Gene-Encoded Human Monoclonal Antibodies against Staphylococcus aureus IsdB Use at Least Three Distinct Modes of Binding To Inhibit Bacterial Growth and Pathogenesis
Source: PubMed Central journal article supplement (PMC6805997; doi:10.1128/mbio.02473-19), 2019-10-22
Supplement: mBio.02473-19-st001.pdf [file mBio.02473-19-st001.pdf]

**Supplemental Table 1. Data collection and refinement statistics for the crystals**

| Data collection        |                   |                  |                   |
|------------------------|-------------------|------------------|-------------------|
| Crystal                | STAU-281/Neat2    | STAU-399         | STAU-229          |
| PDB ID                 | 6P9H              | 6P9I             | 6P9J              |
| Wave Length (Å)        | 0.97872           | 0.97856          | 0.97872           |
| Space group            | P2 <sub>1</sub>   | P2 <sub>1</sub>  | P2 <sub>1</sub>   |
| Unit cell dimensions   |                   |                  |                   |
| a, b, c (Å)            | 72.6, 115.3, 88.3 | 49.6, 99.9, 93.9 | 57.8, 66.0, 112.3 |
| α, β, γ                | 90.0, 100.1, 90.0 | 90.0, 96.3, 90.0 | 90.0, 96.4, 90.0  |
| Resolution (Å)         | 48.04 – 3.00      | 49.29 – 2.40     | 48.92 – 2.20      |
| Unique reflections     | 28660 (4141)      | 35657 (5197)     | 43034 (6144)      |
| Redundancy             | 3.9 (3.8)         | 3.8 (3.9)        | 3.8 (3.8)         |
| Completeness (%)       | 99.8 (98.9)       | 100.0 (100.0)    | 99.7 (98.0)       |
| R <sub>merge</sub> (%) | 6.9 (31.6)        | 8.7 ( 58.1)      | 8.1 (78.8)        |
| I/σ(I)                 | 15.2 (3.8)        | 12.8 (2.4)       | 10.9 (1.8)        |
| Refinement statistics  |                   |                  |                   |
| R <sub>factor</sub>    | 20.64             | 18.50            | 21.81             |
| R <sub>free</sub>      | 22.50             | 24.34            | 26.70             |
| R.m.s.d. (bond) (Å)    | 0.0020            | 0.0016           | 0.0048            |
| R.m.s.d. (angle) (deg) | 0.519             | 0.482            | 0.722             |
| Ramachandran plot      |                   |                  |                   |
| Favored (%)            | 96.99             | 96.86            | 97.43             |
| Allowed (%)            | 2.82              | 3.14             | 2.57              |
| Outliers (%)           | 0.19              | 0.00             | 0.00              |

$R_{\text{merge}} = \frac{\sum \sum |I_{\text{hkl}} - I_{\text{hkl}(j)}|}{\sum I_{\text{hkl}}}$ , where  $I_{\text{hkl}(j)}$  is the observed intensity and  $I_{\text{hkl}}$  is the final average intensity.

$R_{\text{work}} = \frac{\sum ||\text{Fobs}| - |\text{Fcalc}|}{\sum |\text{Fobs}|}$  and  $R_{\text{free}} = \frac{\sum ||\text{Fobs}| - |\text{Fcalc}|}{\sum |\text{Fobs}|}$ , where  $R_{\text{free}}$  and  $R_{\text{work}}$  are calculated using a randomly selected test set of 5% of the data and all reflections excluding the 5% test set, respectively. Numbers in parentheses are for the highest resolution shell.
